# Supplementary material for: Whole-Body Vibration Exercise in Different Postures on Handgrip Strength in Healthy Women: A Cross-Over Study
Source: PubMed Central journal article supplement (PMC7848817; doi:10.3389/fphys.2020.469499), 2021-01-12
Supplement: Table_1.pdf [file Table_1.pdf]

| HANDGRIP STRENGTH ON BASELINE |             |    |    |      |                       |    |    |      |                     |    |    |      |                 |    |    |      |                        |    |    |      |
|-------------------------------|-------------|----|----|------|-----------------------|----|----|------|---------------------|----|----|------|-----------------|----|----|------|------------------------|----|----|------|
| Subjects                      | S1= Control |    |    |      | S2 = Push up modified |    |    |      | S3= Push up placebo |    |    |      | S4 = Half squat |    |    |      | S5= Half squat placebo |    |    |      |
|                               |             |    |    | Mean |                       |    |    | Mean |                     |    |    | Mean |                 |    |    | Mean |                        |    |    | Mean |
| V1                            | 30          | 30 | 30 | 30   | 28                    | 29 | 29 | 29   | 28                  | 28 | 26 | 27   | 29              | 27 | 28 | 28   | 26                     | 28 | 27 |      |
| V2                            | 26          | 27 | 27 | 27   | 22                    | 26 | 28 | 25   | 30                  | 29 | 25 | 28   | 32              | 30 | 30 | 31   | 28                     | 28 | 26 | 27   |
| V3                            | 32          | 32 | 34 | 33   | 30                    | 30 | 32 | 31   | 36                  | 36 | 35 | 36   | 30              | 34 | 34 | 33   | 34                     | 30 | 34 | 33   |
| V4                            | 26          | 25 | 22 | 24   | 22                    | 24 | 23 | 23   | 26                  | 24 | 24 | 25   | 24              | 22 | 22 | 23   | 22                     | 20 | 24 | 22   |
| V5                            | 30          | 29 | 28 | 29   | 32                    | 32 | 30 | 31   | 28                  | 31 | 30 | 30   | 33              | 34 | 33 | 33   | 34                     | 34 | 36 | 35   |
| V6                            | 19          | 18 | 20 | 19   | 21                    | 16 | 16 | 18   | 20                  | 18 | 16 | 18   | 17              | 15 | 15 | 16   | 22                     | 19 | 20 | 20   |
| V7                            | 19          | 16 | 17 | 17   | 21                    | 17 | 20 | 19   | 28                  | 21 | 26 | 25   | 20              | 16 | 20 | 19   | 20                     | 20 | 18 | 19   |
| V8                            | 18          | 22 | 22 | 21   | 18                    | 22 | 23 | 21   | 19                  | 20 | 20 | 20   | 21              | 24 | 20 | 22   | 20                     | 20 | 22 | 21   |
| V9                            | 30          | 31 | 32 | 31   | 29                    | 28 | 29 | 29   | 29                  | 31 | 30 | 30   | 30              | 31 | 30 | 30   | 30                     | 30 | 32 | 31   |
| V10                           | 36          | 38 | 41 | 38   | 35                    | 34 | 36 | 35   | 34                  | 36 | 36 | 35   | 30              | 30 | 30 | 30   | 33                     | 36 | 34 | 34   |
| V11                           | 26          | 25 | 26 | 26   | 27                    | 28 | 23 | 26   | 27                  | 24 | 28 | 26   | 30              | 29 | 26 | 28   | 30                     | 31 | 29 | 30   |
| V12                           | 23          | 23 | 22 | 23   | 23                    | 21 | 24 | 23   | 25                  | 28 | 25 | 26   | 27              | 26 | 24 | 26   | 29                     | 28 | 24 | 27   |
| V13                           | 30          | 30 | 32 | 31   | 40                    | 37 | 36 | 38   | 37                  | 36 | 37 | 37   | 31              | 33 | 36 | 33   | 35                     | 32 | 33 | 33   |
| V14                           | 33          | 29 | 22 | 28   | 34                    | 26 | 34 | 31   | 36                  | 32 | 34 | 34   | 36              | 34 | 34 | 35   | 30                     | 30 | 29 | 30   |
| V15                           | 20          | 18 | 18 | 19   | 20                    | 18 | 20 | 19   | 20                  | 19 | 18 | 19   | 22              | 16 | 16 | 18   | 20                     | 17 | 17 | 18   |
| V16                           | 35          | 35 | 32 | 34   | 35                    | 34 | 32 | 34   | 34                  | 35 | 34 | 34   | 38              | 36 | 36 | 37   | 34                     | 36 | 34 | 35   |
| V17                           | 22          | 20 | 22 | 21   | 26                    | 24 | 20 | 23   | 26                  | 27 | 26 | 26   | 24              | 23 | 20 | 22   | 22                     | 24 | 22 | 23   |
| V18                           | 27          | 18 | 27 | 24   | 22                    | 22 | 38 | 27   | 23                  | 26 | 26 | 25   | 22              | 20 | 20 | 21   | 33                     | 34 | 36 | 34   |
| V19                           | 35          | 35 | 35 | 35   | 32                    | 36 | 30 | 33   | 36                  | 32 | 34 | 34   | 34              | 34 | 36 | 35   | 34                     | 35 | 35 | 35   |

**HANDGRIP STRENGTH AFTER WBVE**

| Subject | S1= Control |    |      | S2 = Push up modified |    |      | S3= Push up placebo |    |      | S4 = Half squat |    |      | S5= Half squat placebo |    |      |    |    |    |    |    |
|---------|-------------|----|------|-----------------------|----|------|---------------------|----|------|-----------------|----|------|------------------------|----|------|----|----|----|----|----|
|         |             |    | Mean |                       |    | Mean |                     |    | Mean |                 |    | Mean |                        |    | Mean |    |    |    |    |    |
| V1      | 29          | 26 | 31   | 29                    | 28 | 26   | 27                  | 27 | 26   | 26              | 26 | 24   | 26                     | 29 | 26   | 28 | 26 | 27 | 27 |    |
| V2      | 28          | 27 | 26   | 27                    | 30 | 29   | 28                  | 29 | 28   | 26              | 29 | 28   | 26                     | 28 | 27   | 22 | 25 | 26 | 24 |    |
| V3      | 34          | 34 | 32   | 33                    | 32 | 31   | 34                  | 32 | 37   | 34              | 31 | 34   | 31                     | 29 | 30   | 30 | 32 | 32 | 31 |    |
| V4      | 24          | 22 | 20   | 22                    | 24 | 24   | 23                  | 24 | 22   | 21              | 22 | 22   | 23                     | 20 | 20   | 21 | 24 | 21 | 20 | 22 |
| V5      | 27          | 28 | 29   | 28                    | 32 | 30   | 32                  | 31 | 31   | 30              | 22 | 28   | 33                     | 32 | 31   | 32 | 32 | 33 | 32 | 32 |
| V6      | 22          | 18 | 16   | 19                    | 18 | 19   | 22                  | 20 | 16   | 16              | 16 | 16   | 18                     | 15 | 16   | 16 | 19 | 14 | 20 | 18 |
| V7      | 17          | 16 | 20   | 18                    | 20 | 18   | 19                  | 19 | 20   | 20              | 22 | 21   | 17                     | 15 | 16   | 16 | 15 | 19 | 20 | 18 |
| V8      | 18          | 22 | 20   | 20                    | 24 | 21   | 23                  | 23 | 18   | 20              | 20 | 19   | 18                     | 20 | 18   | 19 | 20 | 20 | 19 | 20 |
| V9      | 28          | 30 | 28   | 29                    | 30 | 30   | 33                  | 31 | 28   | 28              | 28 | 28   | 28                     | 30 | 32   | 30 | 25 | 28 | 26 | 26 |
| V10     | 36          | 36 | 36   | 36                    | 36 | 37   | 36                  | 36 | 34   | 35              | 36 | 35   | 24                     | 30 | 34   | 29 | 28 | 33 | 34 | 32 |
| V11     | 29          | 30 | 27   | 29                    | 28 | 28   | 27                  | 28 | 22   | 29              | 24 | 25   | 25                     | 28 | 27   | 27 | 26 | 24 | 26 | 25 |
| V12     | 18          | 22 | 19   | 20                    | 20 | 22   | 22                  | 21 | 24   | 22              | 24 | 23   | 21                     | 24 | 22   | 22 | 21 | 22 | 26 | 23 |
| V13     | 30          | 32 | 34   | 32                    | 36 | 38   | 36                  | 37 | 32   | 30              | 33 | 32   | 30                     | 37 | 35   | 34 | 35 | 36 | 36 | 36 |
| V14     | 28          | 26 | 28   | 27                    | 38 | 33   | 34                  | 35 | 34   | 33              | 32 | 33   | 28                     | 32 | 28   | 29 | 28 | 28 | 24 | 27 |
| V15     | 20          | 18 | 18   | 19                    | 22 | 18   | 21                  | 20 | 20   | 17              | 20 | 19   | 14                     | 13 | 14   | 14 | 15 | 16 | 14 | 15 |
| V16     | 34          | 32 | 34   | 33                    | 32 | 37   | 35                  | 35 | 34   | 34              | 36 | 35   | 35                     | 35 | 29   | 33 | 33 | 35 | 32 | 33 |
| V17     | 22          | 22 | 23   | 22                    | 26 | 28   | 26                  | 27 | 20   | 24              | 25 | 23   | 21                     | 18 | 18   | 19 | 20 | 17 | 19 | 19 |
| V18     | 20          | 22 | 23   | 22                    | 22 | 20   | 22                  | 21 | 15   | 26              | 16 | 19   | 19                     | 20 | 18   | 19 | 31 | 34 | 22 | 29 |
| V19     | 34          | 34 | 36   | 35                    | 34 | 34   | 36                  | 35 | 31   | 32              | 34 | 32   | 33                     | 34 | 32   | 33 | 34 | 36 | 34 | 35 |

**EMGrms during HANDGRIP STRENGTH - BASELINE**

| Subjects | <b>S1= control</b> |       |       |       | <b>S2 = Push-up modified</b> |       |       |       | <b>S3 = Push-up placebo</b> |       |       |       | <b>S4 = Half-squat</b> |       |       |       | <b>S5 = Half-squat placebo</b> |       |       |       |
|----------|--------------------|-------|-------|-------|------------------------------|-------|-------|-------|-----------------------------|-------|-------|-------|------------------------|-------|-------|-------|--------------------------------|-------|-------|-------|
|          |                    |       |       | Mean  |                              |       |       | Mean  |                             |       |       | Mean  |                        |       |       | Mean  |                                |       |       | Mean  |
| V1       | 42.28              | 69.50 | 68.32 | 60.03 | 75.62                        | 66.80 | 68.74 | 70.39 | 37.47                       | 35.13 | 36.07 | 36.22 | 76.62                  | 65.28 | 65.24 | 69.05 | 71.97                          | 70.49 | 73.48 | 71.98 |
| V2       | 82.60              | 69.93 | 75.58 | 76.04 | 60.07                        | 59.54 | 62.12 | 60.58 | 37.75                       | 34.94 | 33.04 | 35.24 | 71.24                  | 63.97 | 61.97 | 65.73 | 76.99                          | 67.56 | 74.32 | 72.96 |
| V3       | 71.15              | 61.71 | 61.79 | 64.88 | 84.84                        | 68.41 | 66.47 | 73.24 | 74.59                       | 59.69 | 53.17 | 62.48 | 54.48                  | 58.37 | 51.88 | 54.91 | 74.37                          | 75.09 | 78.47 | 75.98 |
| V4       | 42.82              | 36.33 | 31.88 | 37.01 | 68.10                        | 56.53 | 55.04 | 59.89 | 72.71                       | 69.62 | 57.91 | 66.75 | 76.74                  | 65.55 | 65.09 | 69.13 | 74.32                          | 70.42 | 75.20 | 73.31 |
| V5       | 75.67              | 67.00 | 72.97 | 71.88 | 44.35                        | 39.93 | 36.02 | 40.10 | 60.06                       | 73.65 | 70.05 | 67.92 | 68.47                  | 68.97 | 57.61 | 65.02 | 70.35                          | 75.91 | 72.41 | 72.89 |
| V6       | 61.54              | 62.91 | 59.40 | 61.28 | 31.30                        | 29.45 | 29.94 | 30.23 | 36.95                       | 21.74 | 28.03 | 28.91 | 71.94                  | 66.16 | 45.95 | 61.35 | 56.63                          | 55.13 | 56.20 | 55.99 |
| V7       | 77.12              | 73.90 | 75.61 | 75.54 | 72.45                        | 53.87 | 73.98 | 66.77 | 72.01                       | 59.42 | 70.47 | 67.30 | 58.05                  | 51.90 | 59.61 | 56.52 | 61.63                          | 76.59 | 62.64 | 66.95 |
| V8       | 61.98              | 71.60 | 61.34 | 64.97 | 58.48                        | 60.30 | 73.95 | 64.24 | 55.57                       | 77.97 | 66.28 | 66.61 | 52.95                  | 52.38 | 46.47 | 50.60 | 67.17                          | 73.66 | 67.73 | 69.52 |
| V9       | 74.78              | 72.61 | 71.71 | 73.03 | 62.01                        | 64.73 | 63.79 | 63.51 | 85.40                       | 73.86 | 70.28 | 76.51 | 67.48                  | 71.09 | 58.61 | 65.73 | 76.77                          | 58.96 | 64.92 | 66.88 |
| V10      | 79.74              | 79.46 | 79.30 | 79.50 | 34.35                        | 32.81 | 32.89 | 33.35 | 66.49                       | 75.26 | 66.37 | 69.37 | 68.34                  | 65.43 | 62.15 | 65.31 | 65.11                          | 74.68 | 62.89 | 67.56 |
| V11      | 64.57              | 60.84 | 57.78 | 61.06 | 38.53                        | 33.57 | 33.49 | 35.20 | 48.34                       | 47.28 | 48.73 | 48.12 | 61.85                  | 66.91 | 60.10 | 62.95 | 68.03                          | 69.08 | 69.33 | 68.81 |
| V12      | 71.26              | 65.59 | 63.93 | 66.93 | 29.22                        | 26.77 | 27.02 | 27.67 | 61.72                       | 71.52 | 56.25 | 63.16 | 72.56                  | 73.92 | 76.98 | 74.49 | 71.09                          | 52.27 | 49.25 | 57.54 |
| V13      | 66.44              | 54.94 | 65.04 | 62.14 | 55.71                        | 53.69 | 54.29 | 54.56 | 80.86                       | 69.52 | 64.13 | 71.50 | 55.70                  | 55.92 | 55.78 | 55.80 | 57.99                          | 53.14 | 51.95 | 54.36 |
| V14      | 77.48              | 64.96 | 52.63 | 65.02 | 70.34                        | 49.97 | 57.39 | 59.23 | 83.52                       | 58.9  | 64.77 | 69.06 | 76.07                  | 82.32 | 64.04 | 74.14 | 83.51                          | 68.78 | 61.81 | 71.37 |
| V15      | 66.39              | 52.28 | 55.35 | 58.01 | 58.42                        | 57.75 | 58.5  | 58.22 | 23.54                       | 23.45 | 22.65 | 23.21 | 82.96                  | 65.86 | 75.32 | 74.71 | 67.43                          | 73.41 | 62.34 | 67.73 |
| V16      | 82.05              | 64.88 | 58.44 | 68.46 | 86.28                        | 79.98 | 78.91 | 81.72 | 79.76                       | 67.91 | 61.02 | 69.56 | 92.53                  | 79.37 | 76.15 | 82.68 | 83.02                          | 82.06 | 75.86 | 80.31 |
| V17      | 56.07              | 59.38 | 57.21 | 57.55 | 45.87                        | 45.5  | 48.58 | 46.65 | 38.6                        | 37.3  | 36.49 | 37.46 | 73.41                  | 54.78 | 57.41 | 61.87 | 86.33                          | 76.46 | 86.3  | 83.03 |
| V18      | 62.55              | 49.42 | 85.22 | 65.73 | 54.64                        | 50.89 | 70.00 | 58.51 | 61.86                       | 58.09 | 71.91 | 63.95 | 75.45                  | 78.47 | 36.00 | 63.31 | 85.75                          | 60.41 | 52.76 | 66.31 |
| V19      | 74.82              | 69.31 | 81.55 | 75.23 | 54.8                         | 42.91 | 52.19 | 49.97 | 88.73                       | 62.99 | 72.67 | 74.80 | 57.56                  | 60.01 | 60.39 | 59.32 | 71.70                          | 78.63 | 65.23 | 71.85 |

**EMGrms during HANDGRIP STRENGTH - AFTER WBVE**

| Subjects | S1= control |       |       |       | S2 = Push-up modified |       |       |       | S3 = Push-up placebo |       |       |       | S4 = Half-squat |       |       |       | S5 = Half-squat placebo |       |       |       |
|----------|-------------|-------|-------|-------|-----------------------|-------|-------|-------|----------------------|-------|-------|-------|-----------------|-------|-------|-------|-------------------------|-------|-------|-------|
|          |             |       |       | Mean  |                       |       |       | Mean  |                      |       |       | Mean  |                 |       |       | Mean  |                         |       |       | Mean  |
| V1       | 68.10       | 67.90 | 74.09 | 70.03 | 67.14                 | 62.69 | 54.67 | 61.50 | 36.55                | 37.29 | 38.99 | 37.61 | 60.42           | 62.35 | 40.61 | 54.46 | 62.18                   | 65.03 | 62.63 | 63.28 |
| V2       | 76.80       | 71.10 | 73.49 | 73.80 | 60.97                 | 59.84 | 60.15 | 60.32 | 34.09                | 33.41 | 33.88 | 33.79 | 72.82           | 61.50 | 59.76 | 64.69 | 66.02                   | 69.45 | 71.58 | 69.02 |
| V3       | 72.78       | 61.86 | 61.62 | 65.42 | 70.41                 | 68.10 | 74.05 | 70.85 | 64.58                | 56.07 | 53.42 | 58.02 | 80.27           | 69.62 | 79.03 | 76.31 | 64.75                   | 63.12 | 54.63 | 60.83 |
| V4       | 54.32       | 44.28 | 38.72 | 45.77 | 68.61                 | 53.20 | 56.87 | 59.56 | 57.05                | 46.75 | 47.51 | 50.44 | 54.64           | 49.22 | 64.73 | 56.20 | 74.82                   | 55.95 | 59.03 | 63.27 |
| V5       | 68.58       | 69.73 | 70.92 | 69.74 | 34.51                 | 30.73 | 37.86 | 34.37 | 76.35                | 67.24 | 53.54 | 65.71 | 58.76           | 59.32 | 62.36 | 60.15 | 66.30                   | 69.17 | 76.20 | 70.56 |
| V6       | 63.66       | 48.27 | 43.05 | 51.66 | 23.27                 | 24.40 | 23.17 | 23.61 | 23.59                | 18.00 | 25.14 | 22.24 | 56.75           | 53.24 | 69.09 | 59.69 | 57.15                   | 53.03 | 65.87 | 58.68 |
| V7       | 78.11       | 71.72 | 70.05 | 73.29 | 67.42                 | 59.86 | 62.78 | 63.35 | 56.50                | 57.57 | 65.50 | 59.86 | 57.03           | 49.70 | 60.11 | 55.61 | 64.25                   | 66.10 | 70.37 | 66.91 |
| V8       | 68.46       | 56.54 | 66.65 | 63.88 | 66.34                 | 66.98 | 77.79 | 70.37 | 49.92                | 64.81 | 70.34 | 61.69 | 45.37           | 41.92 | 41.93 | 43.07 | 55.92                   | 70.51 | 59.47 | 61.97 |
| V9       | 69.07       | 64.29 | 70.07 | 67.81 | 78.05                 | 64.86 | 70.81 | 71.24 | 67.69                | 67.57 | 68.22 | 67.83 | 63.84           | 70.68 | 68.93 | 67.82 | 42.91                   | 44.14 | 47.85 | 44.97 |
| V10      | 75.20       | 64.54 | 74.18 | 71.31 | 37.53                 | 31.29 | 30.39 | 33.07 | 56.47                | 54.66 | 59.69 | 56.94 | 57.17           | 67.08 | 68.92 | 64.39 | 65.08                   | 65.90 | 64.27 | 65.08 |
| V11      | 69.08       | 75.47 | 62.66 | 69.07 | 30.62                 | 30.02 | 39.42 | 33.35 | 37.90                | 48.13 | 47.54 | 44.52 | 52.55           | 71.63 | 64.25 | 62.81 | 55.26                   | 53.58 | 56.38 | 55.07 |
| V12      | 61.90       | 69.97 | 59.51 | 63.79 | 25.25                 | 28.40 | 75.47 | 43.04 | 56.57                | 52.04 | 50.19 | 52.93 | 64.67           | 66.72 | 63.18 | 64.86 | 44.03                   | 58.45 | 56.24 | 52.91 |
| V13      | 62.31       | 62.91 | 69.24 | 64.82 | 54.30                 | 54.87 | 54.94 | 54.70 | 69.30                | 66.16 | 66.61 | 67.36 | 54.50           | 56.93 | 56.05 | 55.83 | 52.98                   | 64.40 | 69.46 | 62.28 |
| V14      | 66.07       | 59.44 | 58.53 | 61.35 | 58.23                 | 52.33 | 43.69 | 51.42 | 69.21                | 64.58 | 57.15 | 63.65 | 62.68           | 61.11 | 60.14 | 61.31 | 71.96                   | 60.45 | 63.27 | 65.23 |
| V15      | 67.75       | 58.73 | 58.48 | 61.65 | 59.90                 | 59.45 | 59.73 | 59.69 | 26.40                | 21.54 | 26.45 | 24.80 | 65.72           | 76.54 | 77.51 | 73.26 | 44.87                   | 63.69 | 53.88 | 54.15 |
| V16      | 56.66       | 51.62 | 55.91 | 54.73 | 72.20                 | 68.49 | 78.30 | 73.00 | 73.06                | 53.87 | 66.36 | 64.43 | 67.15           | 68.68 | 63.76 | 66.53 | 62.64                   | 73.77 | 59.63 | 65.35 |
| V17      | 61.59       | 56.94 | 65.56 | 61.36 | 46.85                 | 43.90 | 49.18 | 46.64 | 34.74                | 37.32 | 36.96 | 36.34 | 65.28           | 72.23 | 63.6  | 67.04 | 77.06                   | 75.47 | 77.18 | 76.57 |
| V18      | 69.69       | 60.17 | 57.6  | 62.49 | 62.53                 | 58.17 | 62.90 | 61.20 | 59.88                | 78.25 | 48.44 | 62.19 | 76.27           | 70.85 | 74.38 | 73.83 | 73.04                   | 66.46 | 51.37 | 63.62 |
| V19      | 79.94       | 75.77 | 80.78 | 78.83 | 60.69                 | 64.16 | 57.52 | 60.79 | 69.44                | 70.65 | 69.11 | 69.73 | 57.39           | 58.64 | 54.61 | 56.88 | 71.33                   | 68.50 | 59.74 | 66.52 |

| Neuronal innervation ratio = EMGrms / HS |          |                    |                       |                     |            |            |                    |                       |                     |            |
|------------------------------------------|----------|--------------------|-----------------------|---------------------|------------|------------|--------------------|-----------------------|---------------------|------------|
| Subjects                                 | Baseline |                    |                       |                     |            | After WBVE |                    |                       |                     |            |
|                                          | Control  | Push up<br>Placebo | Half-squat<br>placebo | Push-up<br>modified | Half-squat | Control    | Push up<br>Placebo | Half-squat<br>placebo | Push-up<br>modified | Half-squat |
| V1                                       | 2.00     | 1.33               | 2.63                  | 2.46                | 2.47       | 2.44       | 1.43               | 2.34                  | 2.28                | 2.07       |
| V2                                       | 2.85     | 1.26               | 2.67                  | 2.39                | 2.14       | 2.73       | 1.22               | 2.84                  | 2.08                | 2.37       |
| V3                                       | 1.99     | 1.75               | 2.33                  | 2.39                | 1.68       | 1.96       | 1.71               | 1.94                  | 2.19                | 2.54       |
| V4                                       | 1.52     | 2.71               | 3.33                  | 2.60                | 3.05       | 2.08       | 2.33               | 2.92                  | 2.52                | 2.68       |
| V5                                       | 2.48     | 2.29               | 2.10                  | 1.28                | 1.95       | 2.49       | 2.38               | 2.18                  | 1.10                | 1.88       |
| V6                                       | 3.23     | 1.61               | 2.75                  | 1.71                | 3.92       | 2.77       | 1.39               | 3.32                  | 1.20                | 3.65       |
| V7                                       | 4.36     | 2.69               | 3.46                  | 3.45                | 3.03       | 4.15       | 2.90               | 3.72                  | 3.33                | 3.48       |
| V8                                       | 3.14     | 3.39               | 3.36                  | 3.06                | 2.34       | 3.19       | 3.19               | 3.15                  | 3.10                | 2.31       |
| V9                                       | 2.36     | 2.55               | 2.18                  | 2.22                | 2.17       | 2.37       | 2.42               | 1.71                  | 2.30                | 2.26       |
| V10                                      | 2.07     | 1.96               | 1.97                  | 0.95                | 2.18       | 1.98       | 1.63               | 2.06                  | 0.91                | 2.20       |
| V11                                      | 2.38     | 1.83               | 2.29                  | 1.35                | 2.22       | 2.41       | 1.78               | 2.17                  | 1.21                | 2.36       |
| V12                                      | 2.95     | 2.43               | 2.13                  | 1.22                | 2.90       | 3.24       | 2.27               | 2.30                  | 2.02                | 2.90       |
| V13                                      | 2.03     | 1.95               | 1.63                  | 1.45                | 1.67       | 2.03       | 2.13               | 1.75                  | 1.49                | 1.64       |
| V14                                      | 2.32     | 2.03               | 2.41                  | 1.89                | 2.14       | 2.24       | 1.93               | 2.45                  | 1.47                | 2.09       |
| V15                                      | 3.11     | 1.22               | 3.76                  | 3.01                | 4.15       | 3.30       | 1.31               | 3.61                  | 2.94                | 5.36       |
| V16                                      | 2.01     | 2.03               | 2.32                  | 2.43                | 2.26       | 1.64       | 1.86               | 1.96                  | 2.11                | 2.02       |
| V17                                      | 2.70     | 1.42               | 3.66                  | 2.00                | 2.77       | 2.75       | 1.58               | 4.10                  | 1.75                | 3.53       |
| V18                                      | 2.74     | 2.56               | 1.93                  | 2.14                | 3.06       | 2.88       | 3.27               | 2.19                  | 2.87                | 3.89       |
| V19                                      | 2.15     | 2.20               | 2.07                  | 1.53                | 1.71       | 2.27       | 2.16               | 1.92                  | 1.75                | 1.72       |
